# Supplementary material for: Detection, spread and phylogeny of meticillin-resistant Staphylococcus aureus sequence type 45 in Taiwan
Source: PubMed Central journal article supplement — Microb Genom. 2021 Apr 12;7(4):000555. doi: 10.1099/mgen.0.000555 (PMC8208682; doi:10.1099/mgen.0.000555), 2021-04-12

Supplementary Table. Information of MRSA ST45 strains included for whole genome sequencing

| Strain Name | Collections | Year of isolation | Institutes             |                    | Source type | Age (years) |
|-------------|-------------|-------------------|------------------------|--------------------|-------------|-------------|
|             |             |                   | Type                   | Location of Taiwan |             |             |
| Sau84       | TSAR        | 2010              | Hospital               | Northern           | Blood       | 76          |
| Sau92       | TSAR        | 2010              | Hospital               | Eastern            | Blood       | 78          |
| Sau95       | TSAR        | 2012              | Hospital               | Southern           | Blood       | 42          |
| Sau100      | TSAR        | 2012              | Hospital               | Eastern            | Blood       | 89          |
| Sau102      | TSAR        | 2012              | Hospital               | Central            | Blood       | 69          |
| Sau114      | TSAR        | 2014              | Hospital               | Eastern            | Blood       | 92          |
| Sau116      | TSAR        | 2014              | Hospital               | Southern           | Blood       | 82          |
| Sau122      | TSAR        | 2014              | Hospital               | Central            | Blood       | 82          |
| Sau41       | TSAR        | 2004              | Hospital               | Eastern            | Sputum      | 91          |
| Sau54       | TSAR        | 2006              | Hospital               | Eastern            | Pus         | 43          |
| Sau56       | TSAR        | 2006              | Hospital               | Central            | Wound       | 76          |
| Sau57       | TSAR        | 2006              | Hospital               | Central            | Blood       | 76          |
| Sau62       | TSAR        | 2008              | Hospital               | Southern           | Blood       | 58          |
| Sau70       | TSAR        | 2008              | Hospital               | Central            | Blood       | 58          |
| Sau73       | TSAR        | 2008              | Hospital               | Northern           | Blood       | 84          |
| Sau80       | TSAR        | 2010              | Hospital               | Southern           | Blood       | 76          |
| ILR17       | CGMH        | 2010              | Hospital               | Northern           | Blood       | 80.7        |
| ILR37       | CGMH        | 2010              | Hospital               | Northern           | Blood       | 82.6        |
| ILR76       | CGMH        | 2010              | Hospital               | Northern           | Blood       | 55.4        |
| KTR35       | CGMH        | 2010              | Hospital               | Central            | Blood       | NA          |
| KTR43       | CGMH        | 2010              | Hospital               | Central            | Blood       | NA          |
| KTR58       | CGMH        | 2010              | Hospital               | Central            | Blood       | NA          |
| LCR01       | CGMH        | 2010              | Hospital               | Southern           | Blood       | NA          |
| LCR11       | CGMH        | 2010              | Hospital               | Southern           | Blood       | NA          |
| LCR13       | CGMH        | 2010              | Hospital               | Southern           | Blood       | NA          |
| JGR12       | CGMH        | 2010              | Hospital               | Northern           | Blood       | 81.4        |
| JGR38       | CGMH        | 2009              | Hospital               | Northern           | Blood       | 47.7        |
| JGR69       | CGMH        | 2010              | Hospital               | Northern           | Blood       | 81.2        |
| NCHR52      | CGMH        | 2010              | Hospital               | Central            | Blood       | NA          |
| NCHR53      | CGMH        | 2010              | Hospital               | Central            | Blood       | NA          |
| NCHR59      | CGMH        | 2010              | Hospital               | Central            | Blood       | NA          |
| MKR4        | CGMH        | 2010              | Hospital               | Southern           | Blood       | 84          |
| MKR24       | CGMH        | 2010              | Hospital               | Southern           | Blood       | 78          |
| MKR53       | CGMH        | 2010              | Hospital               | Southern           | Blood       | 63          |
| DR4         | CGMH        | 2010              | Survey in a conference | Northern           | Nose        | 41-50       |

|         |      |      |                                    |          |      |     |
|---------|------|------|------------------------------------|----------|------|-----|
| sta1645 | CGMH | 2012 | Hospital                           | Northern | SP   | 0.5 |
| sta1676 | CGMH | 2012 | Hospital                           | Northern | SP   | 0.2 |
| QR949   | CGMH | 2012 | Hospital                           | Northern | WD   | 47  |
| QR1130  | CGMH | 2012 | Hospital                           | Northern | PUS  | 87  |
| RR5     | CGMH | 2012 | Nursing Home(non-Taiwanese worker) | Northern | Nose | 25  |
| RR8     | CGMH | 2012 | Nursing Home(non-Taiwanese worker) | Northern | Nose | 26  |
| RR13    | CGMH | 2012 | Nursing Home(non-Taiwanese worker) | Northern | Nose | 21  |
| RR14    | CGMH | 2012 | Nursing Home(non-Taiwanese worker) | Northern | Nose | 35  |
| RR19    | CGMH | 2012 | Nursing Home(non-Taiwanese worker) | Northern | Nose | 34  |
| RR20    | CGMH | 2012 | Nursing Home(non-Taiwanese worker) | Northern | Nose | 32  |
| RR23    | CGMH | 2012 | Nursing Home(non-Taiwanese worker) | Northern | Nose | 48  |
| RR34    | CGMH | 2012 | Nursing Home(non-Taiwanese worker) | Northern | Nose | 29  |
| RR51    | CGMH | 2012 | Nursing Home(non-Taiwanese worker) | Northern | Nose | 29  |
| RR62    | CGMH | 2012 | Nursing Home(non-Taiwanese worker) | Southern | Nose | 43  |
| RR68    | CGMH | 2012 | Nursing Home(non-Taiwanese worker) | Southern | Nose | 37  |
| RR96    | CGMH | 2012 | Nursing Home(non-Taiwanese worker) | Northern | Nose | 23  |
| RR97    | CGMH | 2012 | Nursing Home(non-Taiwanese worker) | Northern | Nose | 24  |
| RR103   | CGMH | 2012 | Nursing Home(non-Taiwanese worker) | Northern | Nose | 23  |
| RR111   | CGMH | 2012 | Nursing Home(non-Taiwanese worker) | Northern | Nose | 66  |
| RR7     | CGMH | 2012 | Nursing Home(Taiwanese worker)     | Northern | Nose | 35  |
| RR17    | CGMH | 2012 | Nursing Home(Taiwanese worker)     | Northern | Nose | 29  |

|        |      |      |                                    |          |      |    |
|--------|------|------|------------------------------------|----------|------|----|
| RR105  | CGMH | 2012 | Nursing Home (Taiwanese worker)    | Northern | Nose | 33 |
| RR107  | CGMH | 2012 | Nursing Home (Taiwanese worker)    | Northern | Nose | 52 |
| RR1    | CGMH | 2012 | Nursing Home (resident)            | Northern | Nose | 75 |
| ABR10  | CGMH | 2016 | Nursing Home(non-Taiwanese worker) | Northern | Nose | 26 |
| ABR23  | CGMH | 2016 | Nursing Home(non-Taiwanese worker) | Northern | Nose | 31 |
| ABR29  | CGMH | 2016 | Nursing Home(non-Taiwanese worker) | Northern | Nose | 27 |
| ABR39  | CGMH | 2016 | Nursing Home(non-Taiwanese worker) | Northern | Nose | 36 |
| ABR102 | CGMH | 2016 | Nursing Home(non-Taiwanese worker) | Northern | Nose | 36 |
| ACR3   | CGMH | 2017 | Foreign worker's survey            | Northern | Nose | 26 |
| ACR10  | CGMH | 2017 | Foreign worker's survey            | Northern | Nose | 24 |
| ACR14  | CGMH | 2017 | Foreign worker's survey            | Northern | Nose | 34 |
| ACR15  | CGMH | 2017 | Foreign worker's survey            | Northern | Nose | 39 |
| ACR33  | CGMH | 2017 | Foreign worker's survey            | Northern | Nose | 30 |
| ACR34  | CGMH | 2017 | Foreign worker's survey            | Northern | Nose | 30 |
| ACR35  | CGMH | 2017 | Foreign worker's survey            | Northern | Nose | 32 |
| ACR36  | CGMH | 2017 | Foreign worker's survey            | Northern | Nose | 35 |
| ACR37  | CGMH | 2017 | Foreign worker's survey            | Northern | Nose | 21 |
| ACR52  | CGMH | 2017 | Foreign worker's survey            | Northern | Nose | 25 |
| ACR40  | CGMH | 2017 | Foreign worker's survey            | Northern | Nose | 42 |

TSAR, Taiwan Surveillance of Antimicrobial Resistance, a biennial survey of antimicrobial resistance in Taiwan

CGMH, Chang Gung Memorial Hospital

Supplementary figure 1. Phylogenetic tree of 75 ST45 MRSA isolates identified from Taiwan revealed two clades.

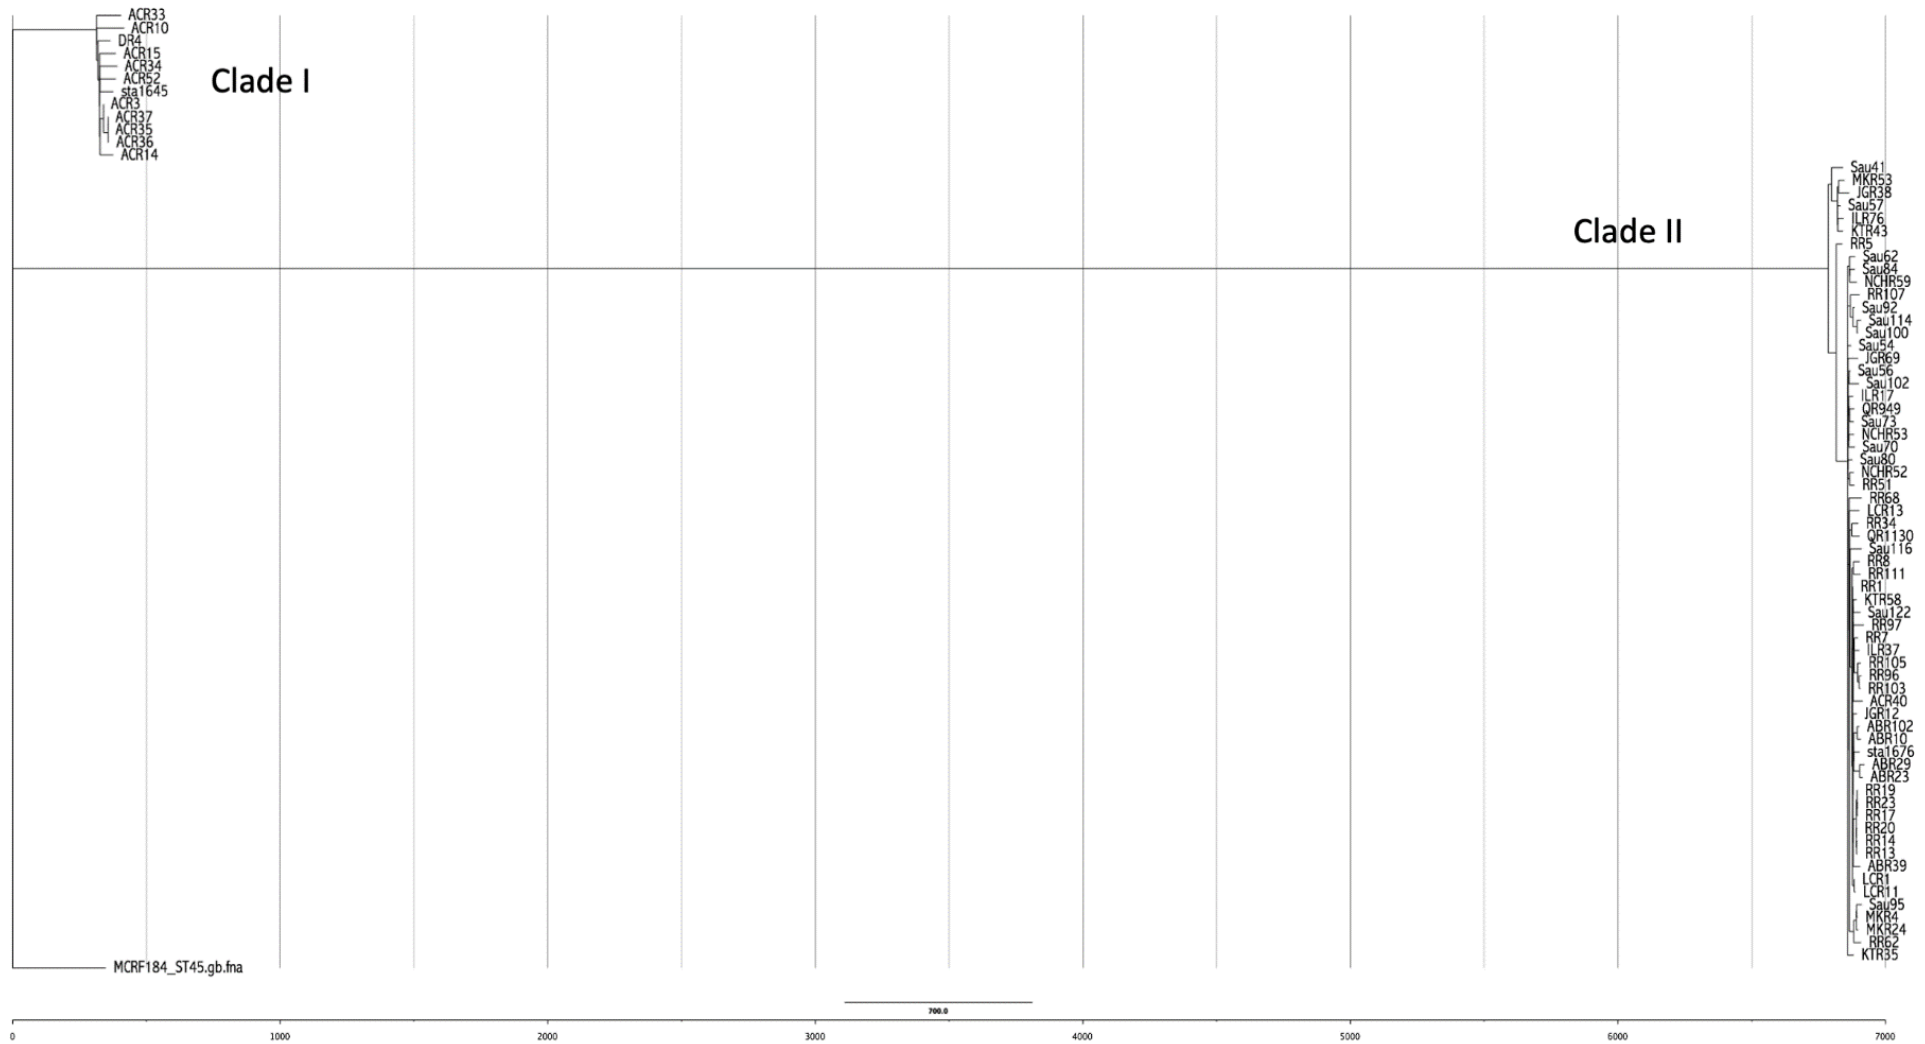

Supplement: mgen-7-0555-s001.pdf [file mgen-7-0555-s001.pdf]
